# Supplementary material for: Spiropyran-based polymeric micelles in aqueous solution: light-regulated reversible size alterations and catalytic characteristics
Source: Royal Society of Chemistry journal article supplement (doi:10.1039/d2py01405j), 2023-01-01
Supplement: d2py01405j1.pdf [file d2py01405j1.pdf]

## Supporting Information

### **Spiropyran-based polymeric micelles in aqueous solution: light-regulated reversible size alterations and catalytic characteristics**

Yuting Min,<sup>#a</sup> Ruizhen Zhang,<sup>#a</sup> Xuli Dong,<sup>a,e</sup> Lifang Zhang,<sup>a,e</sup> Dongming Qi,<sup>a,c,d</sup> Zan Hua,<sup>\*b</sup> and Tao Chen<sup>\*a,c,d</sup>

<sup>a</sup> Zhejiang Provincial Engineering Research Center for Green and Low-carbon Dyeing & Finishing, Zhejiang Sci-Tech University, Hangzhou 310018, China

<sup>b</sup> Biomass Molecular Engineering Center and Department of Materials Science and Engineering, Anhui Agricultural University, Hefei 230036, China

<sup>c</sup> Key Laboratory of Green Cleaning Technology & Detergent of Zhejiang Province, Lishui, Zhejiang, 323000, China

<sup>d</sup> Zhejiang Provincial Innovation Center of Advanced Textile Technology, Keqiao, Zhejiang, 312030 China

<sup>e</sup> Zhejiang Cady Industry Co., Ltd., Huzhou, 313013, China

\*Corresponding Authors: tao.chen@zstu.edu.cn (T. Chen), z.hua@ahau.edu.cn (Z. Hua)

# These authors contributed equally to this work. Minyu Ting. and Ruizhen Zhang

## Contents

|                                                                                                                                                                                                               |    |
|---------------------------------------------------------------------------------------------------------------------------------------------------------------------------------------------------------------|----|
| 1 Experimental Section .....                                                                                                                                                                                  | 3  |
| 1.1 Preparation of SPA .....                                                                                                                                                                                  | 3  |
| 1.2 Synthesis of P(MMA <sub>14</sub> )-NHS .....                                                                                                                                                              | 5  |
| 1.3 Synthesis of P(SPA <sub>10</sub> - <i>b</i> -MMA <sub>14</sub> )-NHS.....                                                                                                                                 | 6  |
| 1.4 Synthesis of P(OEGMA <sub>51</sub> - <i>b</i> -SPA <sub>10</sub> - <i>b</i> -MMA <sub>14</sub> )-NHS (1) .....                                                                                            | 6  |
| 1.5 Synthesis of P(OEGMA <sub>56</sub> - <i>b</i> -MMA <sub>14</sub> )-NHS .....                                                                                                                              | 7  |
| 2 SEC curves .....                                                                                                                                                                                            | 8  |
| 3 DLS and color comparison of diblock copolymers before and after UV. ....                                                                                                                                    | 9  |
| 4 Dye removal rate. ....                                                                                                                                                                                      | 10 |
| 5 Synthesis of P(OEGMA <sub>51</sub> - <i>b</i> -SPA <sub>10</sub> - <i>b</i> -MMA <sub>14</sub> )-TREN-Boc and P(OEGMA <sub>51</sub> - <i>b</i> -SPA <sub>10</sub> - <i>b</i> -MMA <sub>14</sub> )-NHS. .... | 10 |
| 6 Synthesis of P(OEGMA <sub>51</sub> - <i>b</i> -SPA <sub>10</sub> - <i>b</i> -MMA <sub>14</sub> )-TREN (2) .....                                                                                             | 11 |
| 7 TEM images of self-assemblies of Catalytic Nanomicelles .....                                                                                                                                               | 11 |

# 1 Experimental Section

## 1.1 Preparation of SPA

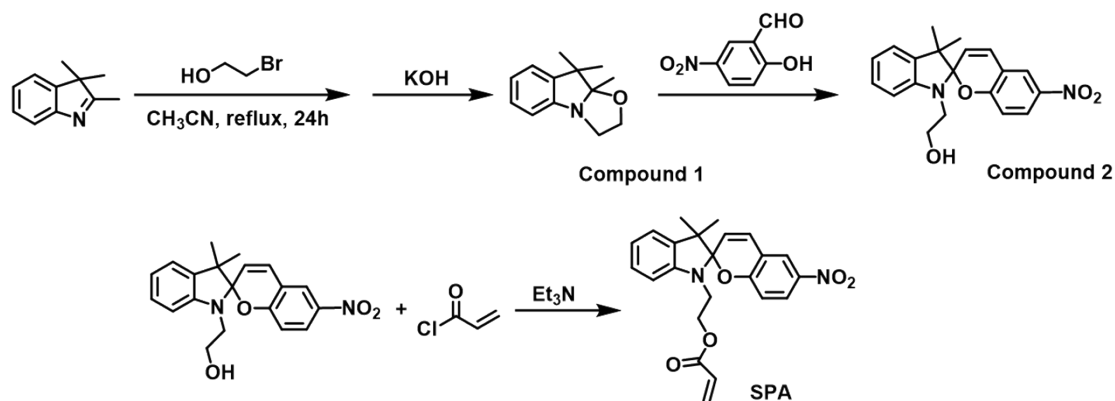

The synthetic details of SPA can be found in Scheme S1. First, 2,3,3-trimethyl-1H-indole (12.6 mmol, 2.0 g) and 2-bromoethanol (15.1 mmol, 1.7 g) were refluxed in acetonitrile (25 mL) for 24 h under nitrogen atmosphere. The mixture was then washed three times with n-hexane (25 mL), and concentrated in vacuo to work up a purple-red solid (2.8 g). Next, KOH (1.17 g) aqueous solution (40 mL) was added, and the mixture was stirred for 30 minutes. The solution was extracted with ether (20 mL  $\times$  3). The extracted ether solution was washed with deionized water (30 mL  $\times$  3) and concentrated in vacuo to afford compound **1** as a yellow oil.  $^1\text{H NMR}$  (400 MHz,  $\text{CDCl}_3$ )  $\delta$  7.15 (td,  $J = 7.6, 1.3$  Hz, 1H), 7.11 – 7.06 (m, 1H), 6.94 (td,  $J = 7.4, 0.9$  Hz, 1H), 6.78 (d,  $J = 7.8$  Hz, 1H), 3.88 – 3.70 (m, 2H), 3.63 – 3.48 (m, 2H), 1.45 (s, 3H), 1.41 (s, 3H), 1.20 (s, 3H).

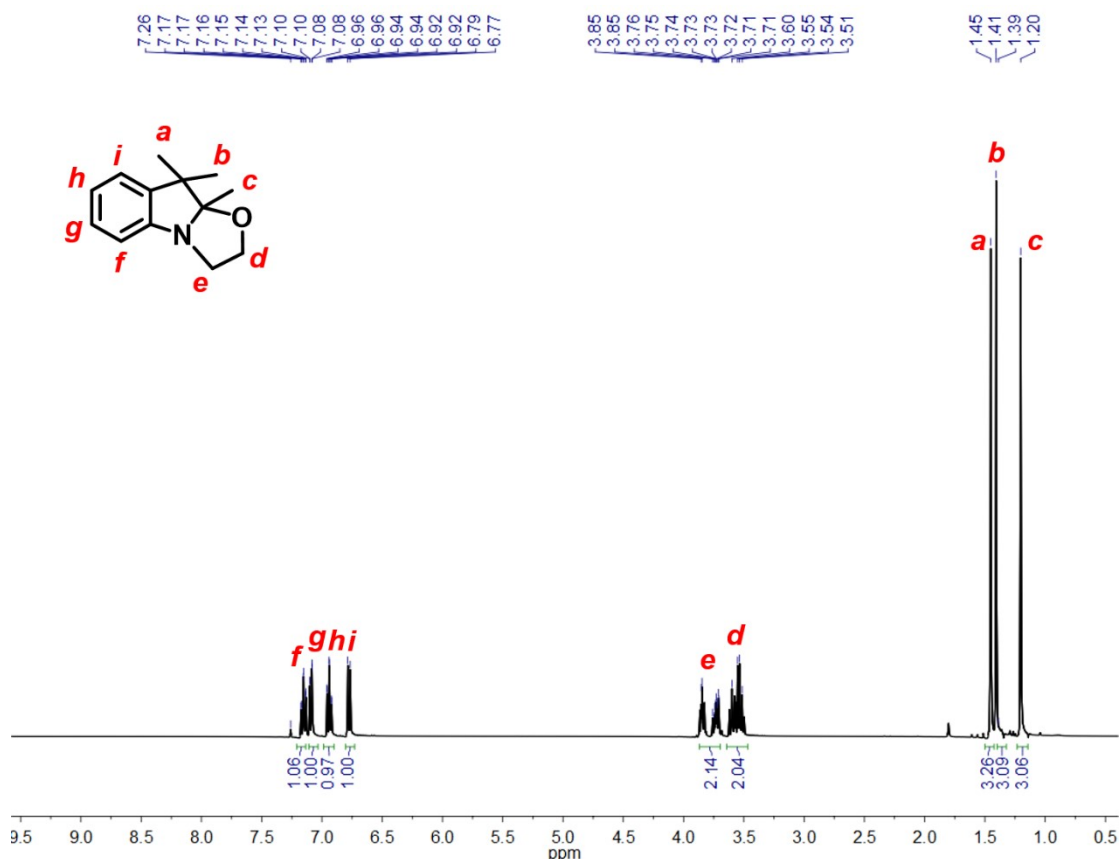

**Figure S1.**  $^1\text{H}$  NMR spectrum of compound **1** (400 MHz,  $\text{CDCl}_3$ )

The resulting compound **1** (7.4 mmol, 71.5 mg) was refluxed with 2-hydroxy-5-nitrobenzaldehyde (11.1 mmol, 1.9 g) in ethanol (15 mL) under nitrogen atmosphere for 5 hours. After cooling the reaction flask to room temperature, the suspension was filtered with suction and washed with ethanol to obtain a purple filter cake, which was vacuum dried overnight to obtain a purple compound **2**.  $^1\text{H}$  NMR (400 MHz,  $\text{CDCl}_3$ )  $\delta$  8.01 (dt,  $J = 6.1, 2.7$  Hz, 2H), 7.19 (td,  $J = 7.7, 1.2$  Hz, 1H), 7.10 (d,  $J = 7.3$  Hz, 1H), 6.90 (dd,  $J = 8.6, 5.9$  Hz, 2H), 6.76 (d,  $J = 8.8$  Hz, 1H), 6.67 (d,  $J = 7.8$  Hz, 1H), 5.88 (d,  $J = 10.4$  Hz, 1H), 3.84–3.70 (m, 2H), 3.49–3.20 (m, 2H), 1.29 (s, 3H), 1.20 (s, 3H).

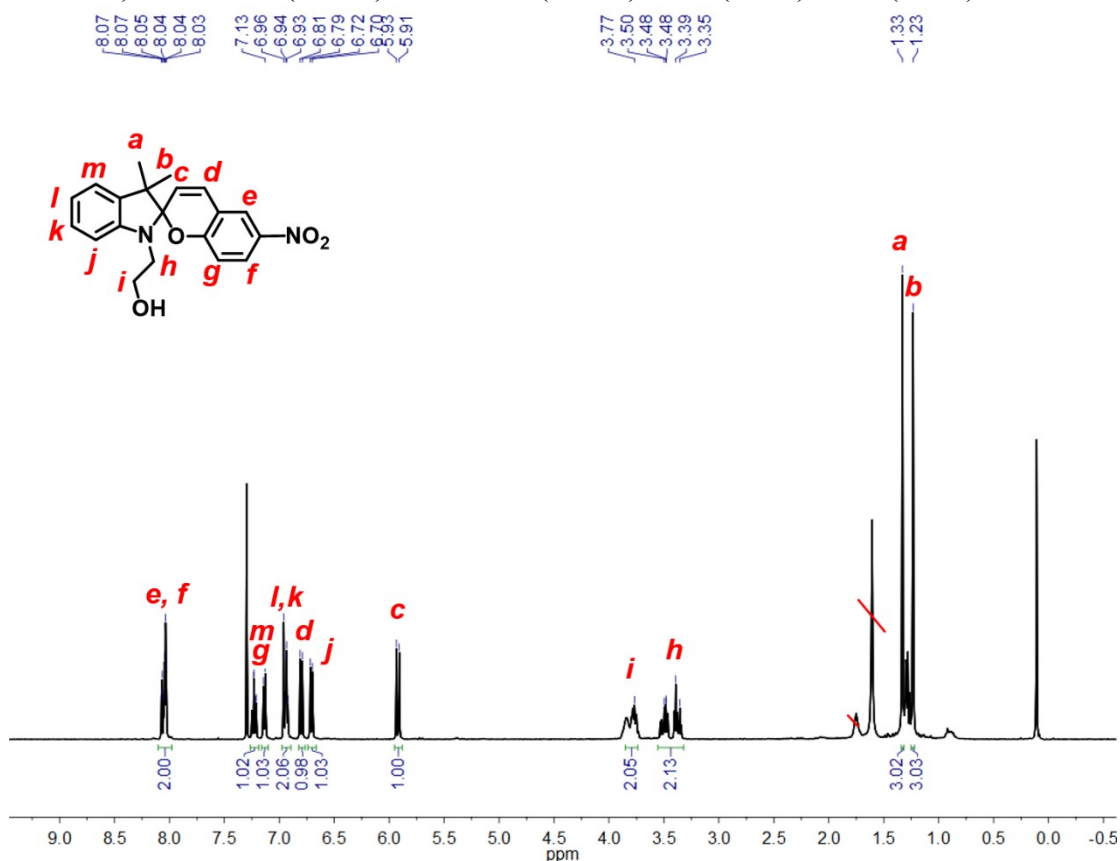

**Figure S2.**  $^1\text{H}$  NMR spectrum of compound **2** (400 MHz,  $\text{CDCl}_3$ )

The obtained compound **2** (1.0 g, 3.3 mmol) and  $\text{Et}_3\text{N}$  (0.5 g, 4.9 mmol) were dissolved in anhydrous  $\text{CH}_2\text{Cl}_2$ . Under an ice bath, acryloyl chloride (0.5 g, 4.9 mmol) in  $\text{CH}_2\text{Cl}_2$  (10 mL) was slowly added to the reaction flask. The mixture was stirred for 30 min, then refluxed for 4 h. After the reaction, the mixture was concentrated in vacuo to obtain the crude product. The crude product was purified by column chromatography to give SPA as a purple solid.  $^1\text{H}$  NMR (400 MHz,  $\text{CDCl}_3$ )  $\delta$  8.17–7.80 (m, 2H), 7.21 (td,  $J = 7.7, 1.0$  Hz, 1H), 7.09 (d,  $J = 7.2$  Hz, 1H), 6.90 (dd,  $J = 8.9, 5.3$  Hz, 2H), 6.75 (d,  $J = 8.6$  Hz, 1H), 6.69 (d,  $J = 7.8$  Hz, 1H), 6.37 (dt,  $J = 14.8, 7.4$  Hz, 1H), 6.11–5.99 (m, 1H), 5.90–5.79 (m, 2H), 4.31 (t,  $J = 6.3$  Hz, 2H), 3.62–3.35 (m, 2H), 1.28 (s, 3H), 1.16 (s, 3H).

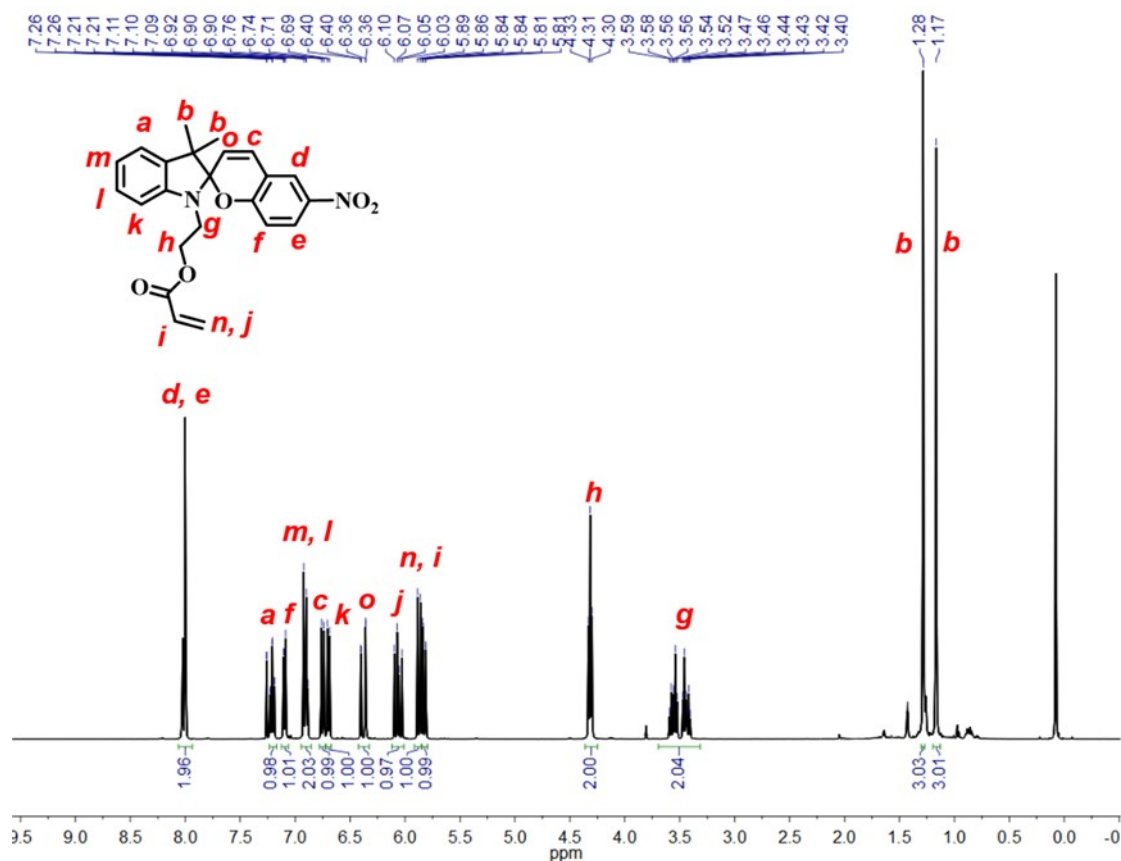

Figure S3.  $^1\text{H}$  NMR spectrum of SPA (400 MHz,  $\text{CDCl}_3$ )

## 1.2 Synthesis of $\text{P}(\text{MMA}_{14})\text{-NHS}$

$$DP_{\text{MMA}} = \frac{g}{4} * \frac{a}{3} = \frac{4}{4} * \frac{42.03}{3} \approx 14 \quad (\text{Eq. S1})$$

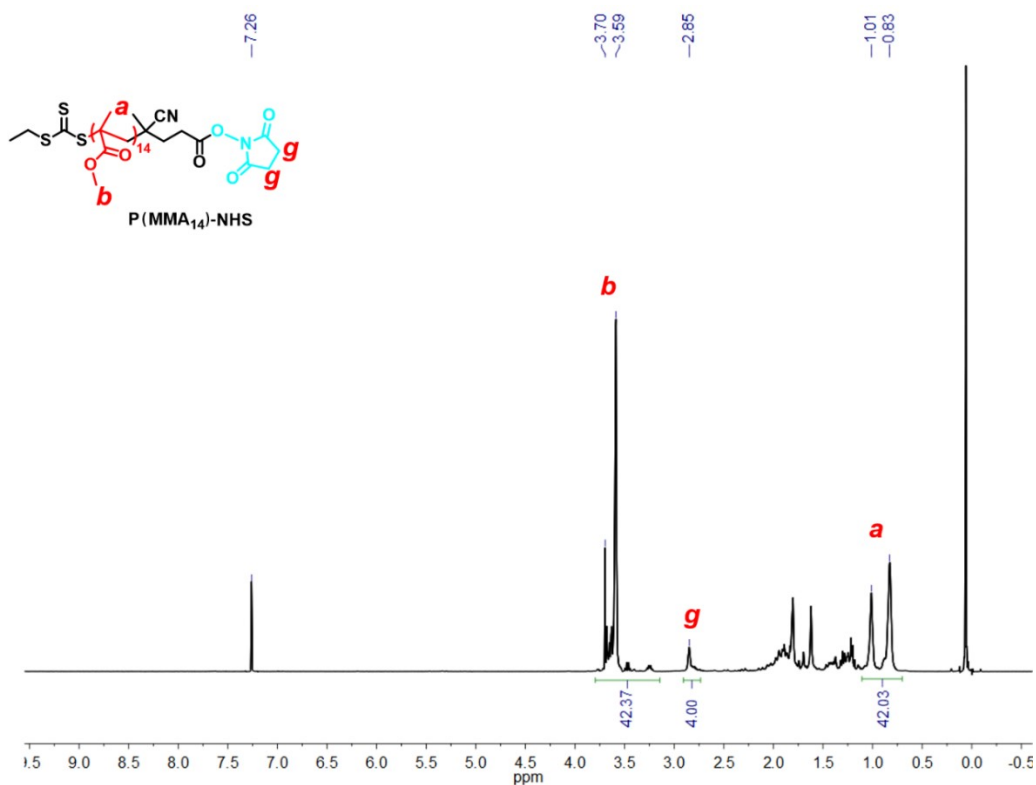

Figure S4.  $^1\text{H}$  NMR spectrum of  $\text{P}(\text{MMA}_{14})\text{-NHS}$  (400 MHz,  $\text{CDCl}_3$ )

### 1.3 Synthesis of P(SPA<sub>10</sub>-*b*-MMA<sub>14</sub>)-NHS

$$DP_{SPA} = \frac{k}{14 * 3} * \frac{c}{2} = \frac{42}{3 * 14} * \frac{22.69}{2} \approx 10 \quad (\text{Eq. S2})$$

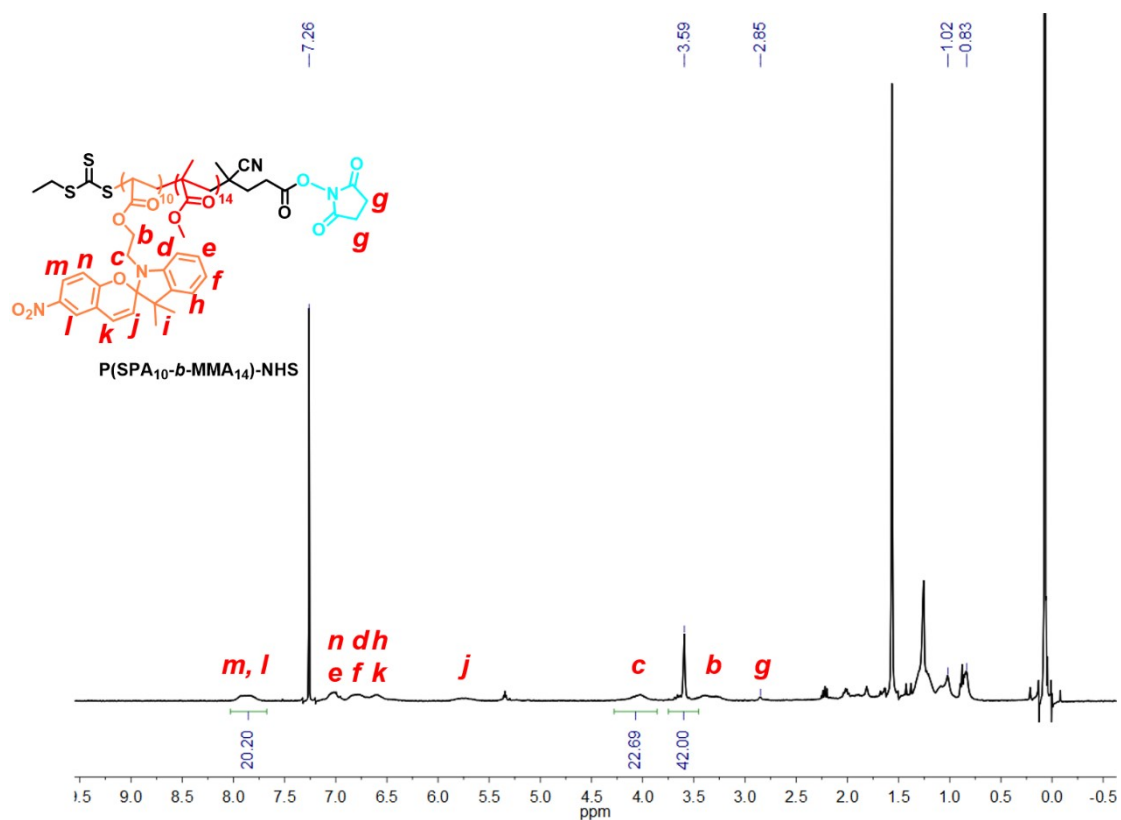

Figure S5. <sup>1</sup>H NMR spectrum of P(SPA<sub>10</sub>-*b*-MMA<sub>14</sub>)-NHS (400 MHz, CDCl<sub>3</sub>)

### 1.4 Synthesis of P(OEGMA<sub>51</sub>-*b*-SPA<sub>10</sub>-*b*-MMA<sub>14</sub>)-NHS (1)

$$Conv. = \frac{b - b'}{b} = \frac{72.72 - 10.53}{72.72} \approx 85.5\% , DP_{OEGMA} \approx 85.5\% \times 60 \approx 51 \quad (\text{Eq. S3})$$

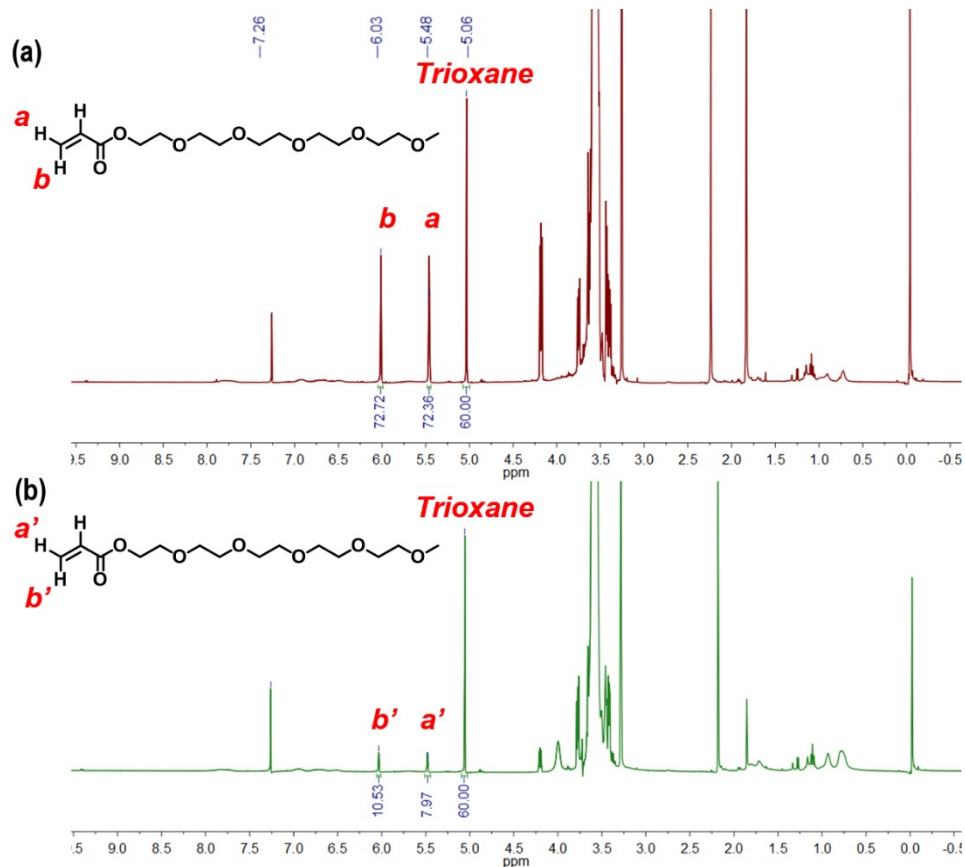

**Figure S6.** (a) <sup>1</sup>H NMR spectrum of the mixture before the reaction (400 MHz, CDCl<sub>3</sub>) with 10 equiv. of s-trioxane as the internal standard and 60 equiv. of OEGMA added before the reaction. (b) Unpurified <sup>1</sup>H NMR spectrum after the reaction. (400 MHz, CDCl<sub>3</sub>)

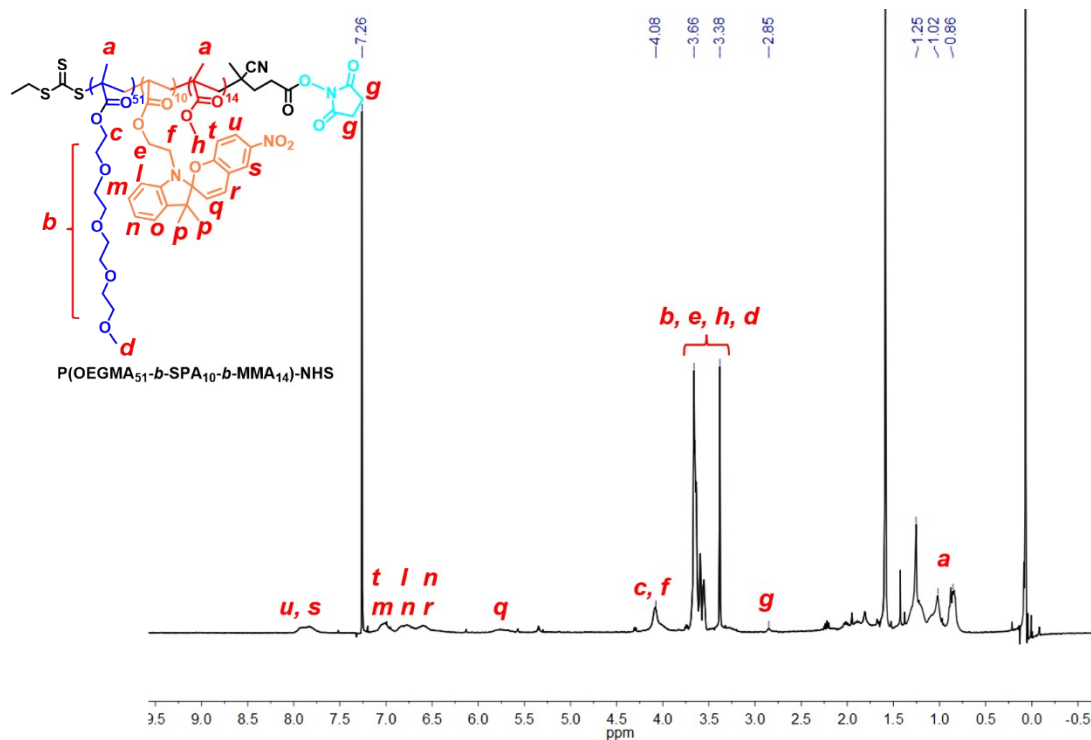

**Figure S7.** <sup>1</sup>H NMR spectrum of P(OEGMA<sub>51</sub>-b-SPA<sub>10</sub>-b-MMA<sub>14</sub>)-NHS (400 MHz, CDCl<sub>3</sub>)

## 1.5 Synthesis of P(OEGMA<sub>56</sub>-b-MMA<sub>14</sub>)-NHS

P(MMA<sub>14</sub>)-NHS (100 mg, 0.057 mmol), OEGMA (498.2 mg, 3.4 mmol), trioxane (51.17 mg, 0.57 mmol) and AIBN (1.4 mg, 0.008 mmol) were dissolved in 1,4-dioxane (5 mL). and transferred to a 25 mL ampule. The solution was degassed by three freeze-pump-thaw cycles, then the ampule was refilled with nitrogen and sealed. RAFT polymerization was carried out at 70 °C overnight. The reaction was exposed to air and the temperature was lowered to 0 °C to quench the reaction. The diblock copolymer was obtained by precipitation in cold petroleum ether. DP<sub>OEGMA</sub> = 56.

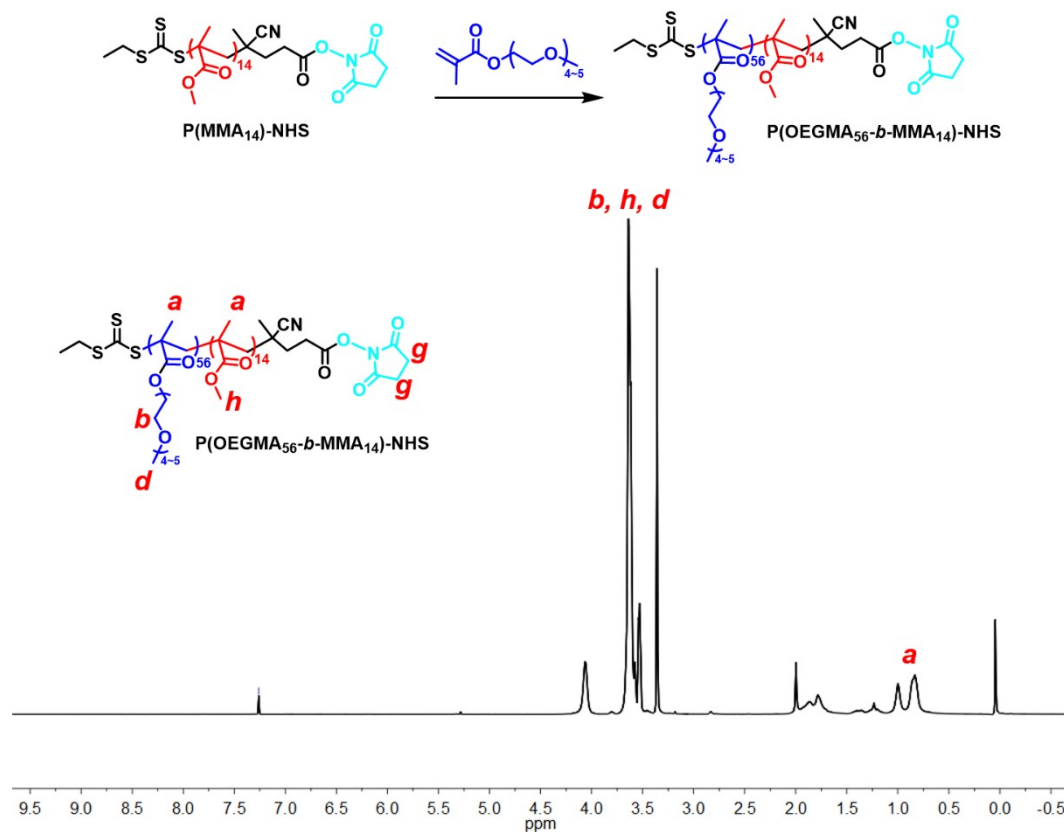

**Figure S8.** <sup>1</sup>H NMR spectrum of P(OEGMA<sub>56</sub>-*b*-MMA<sub>14</sub>)-NHS (400 MHz, CDCl<sub>3</sub>)

## 2 SEC curves

The molecular weights were measured by size exclusion chromatography (SEC) using a waters breeze polymer labs SEC system in THF at 30 °C (1.0 mL/min). (Number average molecular weights ( $M_n$ ) were determined by size exclusion chromatography in THF)



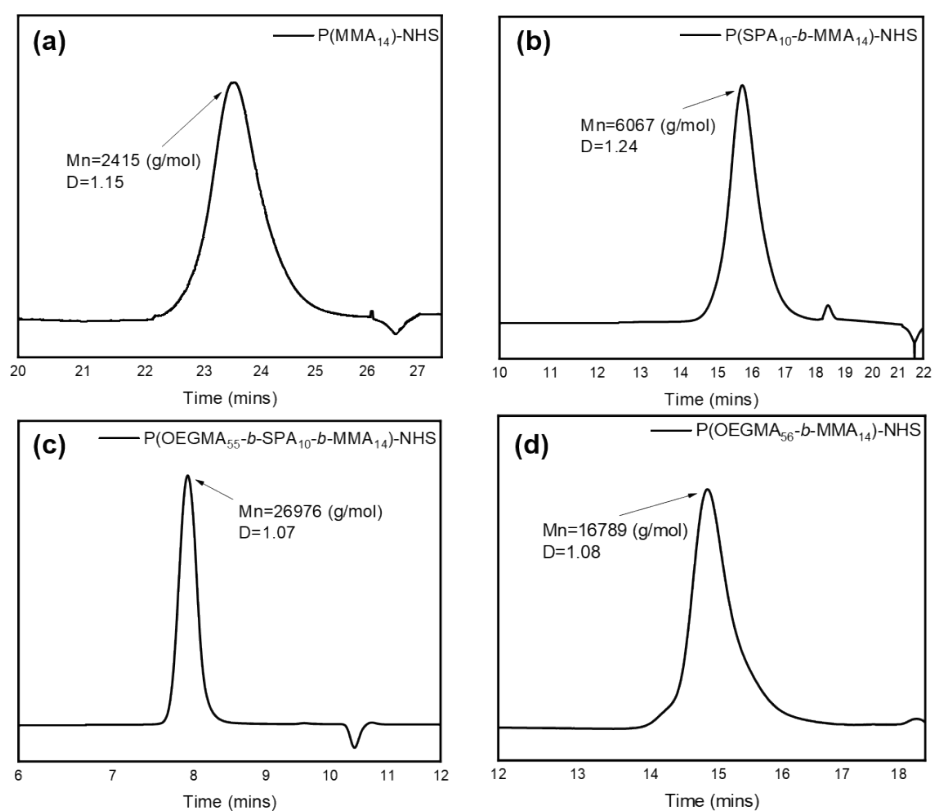

**Figure S9.** SEC traces of (a) P(MMA<sub>14</sub>)-NHS; (b) P(SPA<sub>10</sub>-*b*-MMA<sub>14</sub>)-NHS; (c) P(OEGMA<sub>51</sub>-*b*-SPA<sub>10</sub>-*b*-MMA<sub>14</sub>)-NHS; (d) P(OEGMA<sub>51</sub>-*b*-MMA<sub>14</sub>)-NHS.

### 3 DLS and color comparison of diblock copolymers before and after UV.

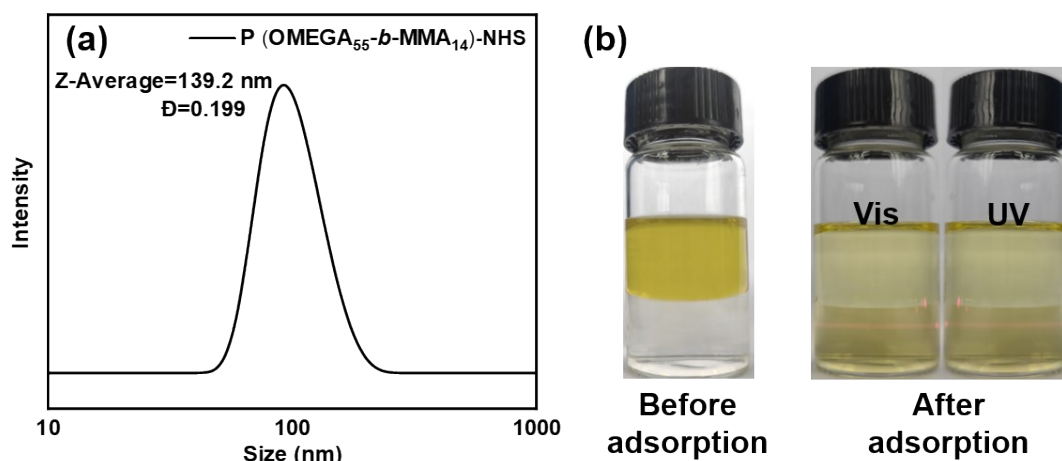

**Figure S10.** (a) DLS curve of P(OEGMA<sub>56</sub>-*b*-MMA<sub>14</sub>)-NHS; (b) before and after adsorption of methyl red (0.03 mg/mL) by micelles from P(OEGMA<sub>56</sub>-*b*-MMA<sub>14</sub>)-NHS under visible light and UV light

## 4 Dye removal rate.

$$\text{Dye removal rate} = \frac{\text{Absorbance}_{\text{Before adsorption}} - \text{Absorbance}_{\text{After adsorption}}}{\text{Absorbance}_{\text{Before adsorption}}} * 100\% \quad (\text{Eq. S4})$$

## 5 Synthesis of P(OEGMA<sub>51</sub>-*b*-SPA<sub>10</sub>-*b*-MMA<sub>14</sub>)-TREN-Boc and P(OEGMA<sub>51</sub>-*b*-SPA<sub>10</sub>-*b*-MMA<sub>14</sub>)-NHS.

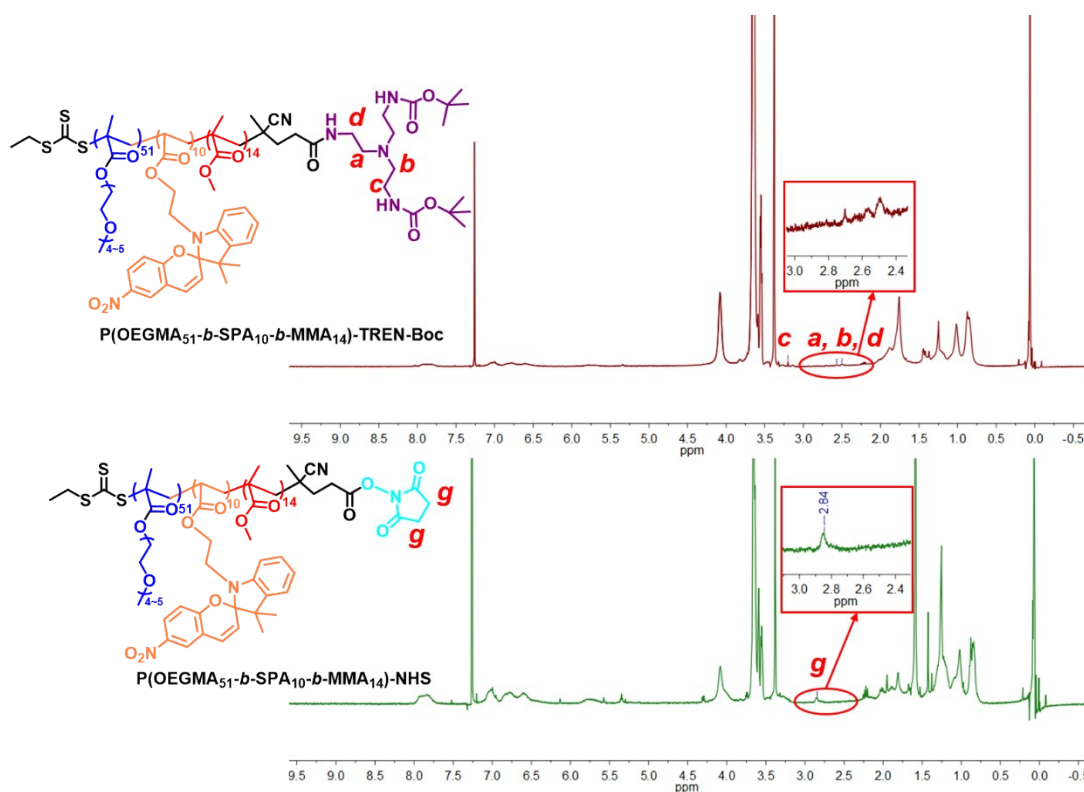

**Figure S11.** Comparison of <sup>1</sup>H NMR spectra before and after introduction of TREN-Boc (400 MHz, CDCl<sub>3</sub>)

## 6 Synthesis of P(OEGMA<sub>51</sub>-*b*-SPA<sub>10</sub>-*b*-MMA<sub>14</sub>)-TREN (2)

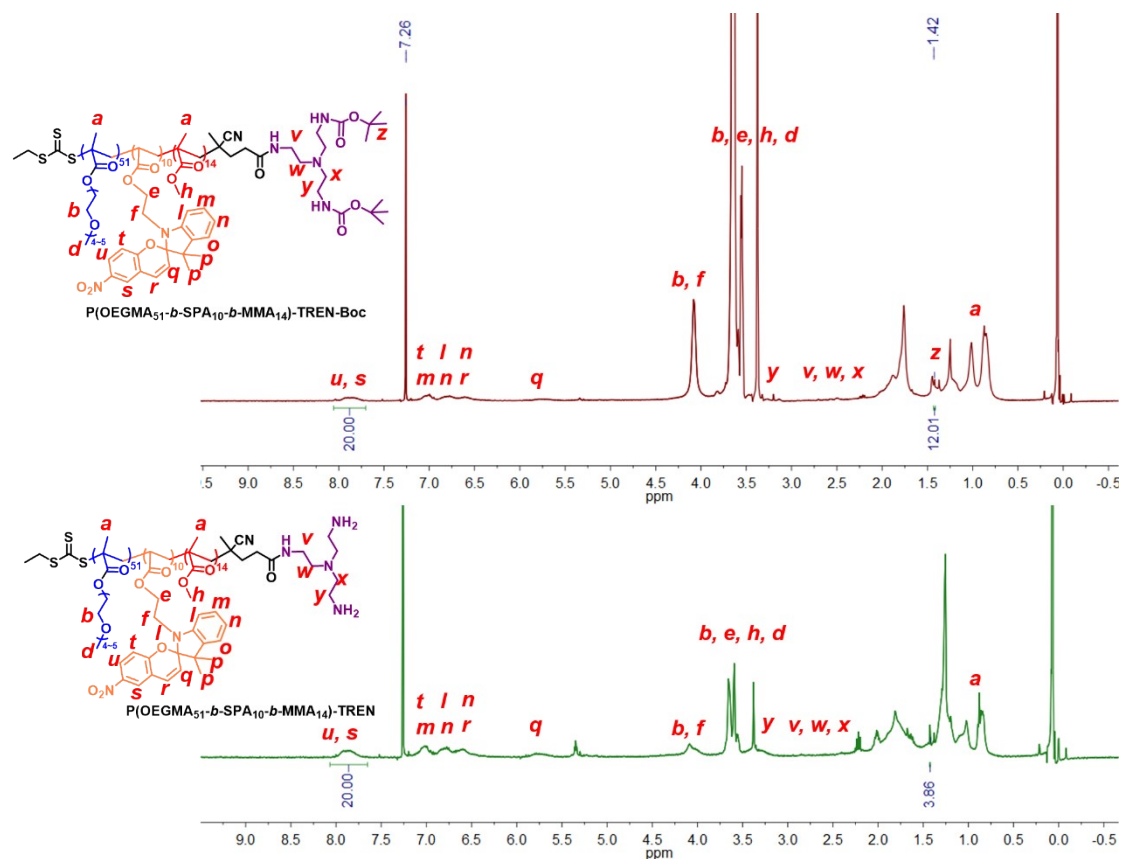

**Figure S12.** <sup>1</sup>H NMR spectra before and after the removal of N-Boc. (400 MHz, CDCl<sub>3</sub>)

## 7 TEM images of self-assemblies of Catalytic Nanomicelles

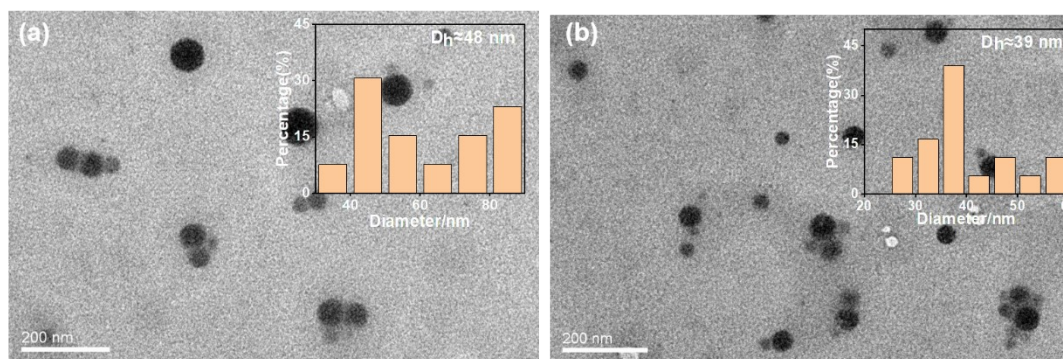

**Figure S13.** TEM images of self-assemblies of Catalytic Nanomicelles: (a) P(OEGMA<sub>51</sub>-*b*-SPA<sub>10</sub>-*b*-MMA<sub>14</sub>)-TREN under visible light; (b) P(OEGMA<sub>51</sub>-*b*-SPA<sub>10</sub>-*b*-MMA<sub>14</sub>)-TREN under UV irradiation.
